# Supplementary material for: First metallamacrocyclic complexes of Pt(iv) with 3,3,3′,3′-tetraalkyl-1,1′-phenylenedicarbonylbis(thioureas): synthesis by direct or electrolytic oxidative addition of I2, Br2 and Cl2
Source: Royal Society of Chemistry journal article supplement (doi:10.1039/b507188g), 2005-01-01
Supplement: b507188g.pdf [file b507188g.pdf]

Electronic Supplementary Information for Dalton Transactions  
 This journal is © The Royal Society of Chemistry 2005

**Supplementary Data** Hydrogen-bonding geometry (Å, °) for structures **5**, **6**, and **7**.

| Donor-H...Acceptor                     | Donor-H | H...Acceptor | Donor...Acceptor | Donor-H...Acceptor |
|----------------------------------------|---------|--------------|------------------|--------------------|
| <b>5</b>                               |         |              |                  |                    |
| C(33)-H(33B)...S(1)                    | 0.99    | 2.51         | 2.983(4)         | 109                |
| C(53)-H(53B)...S(2)                    | 0.99    | 2.47         | 2.892(4)         | 105                |
| <b>6</b>                               |         |              |                  |                    |
| C(33)-H(33B)...S(1)                    | 0.99    | 2.44         | 2.898(6)         | 108                |
| C(53)-H(53B)...S(2)                    | 0.99    | 2.48         | 2.947(6)         | 108                |
| C(56)-H(56A)...(Br1 <sup>iv</sup> )    | 0.98    | 2.89         | 3.788(9)         | 154                |
| C(53)-H(53A)...(Br1 <sup>iv</sup> )    | 0.99    | 2.78         | 3.763(6)         | 174                |
| C(33)-H(33B)...(Br2 <sup>vii</sup> )   | 0.99    | 2.87         | 3.739(6)         | 147                |
| C(34)-H(34A)...(Br1 <sup>iv</sup> )    | 0.98    | 2.88         | 3.847(8)         | 169                |
| <b>7</b>                               |         |              |                  |                    |
| C(33)-H(33B)...S(1A)                   | 0.99    | 2.37         | 2.872(17)        | 110                |
| C(53)-H(53A)...S(2A)                   | 0.99    | 2.53         | 2.957(7)         | 106                |
| C(53)-H(53B)...Cl(1A <sup>v</sup> )    | 0.99    | 2.56         | 3.526(7)         | 164                |
| C(33)-H(33B)...Cl(2A <sup>vi</sup> )   | 0.99    | 2.80         | 3.561(7)         | 134                |
| C(38)-H(38C)...Cl(1A <sup>viii</sup> ) | 0.98    | 2.56         | 3.490(15)        | 158                |
| C(56)-H(56B)...Cl(2A <sup>viii</sup> ) | 0.98    | 2.62         | 3.494(16)        | 148                |
| C(33)-H(33B)...S(1B)                   | 0.99    | 2.42         | 2.841(24)        | 105                |
| C(53)-H(53A)...S(2B)                   | 0.99    | 2.25         | 2.818(7)         | 115                |
| C(57)-H(57B)...Cl(1B <sup>ix</sup> )   | 0.99    | 2.11         | 2.779(15)        | 123                |
| C(58)-H(58B)...Cl(1B <sup>ix</sup> )   | 0.98    | 2.98         | 3.394(21)        | 107                |
| C(1)-H(1)...Cl(2B <sup>x</sup> )       | 0.95    | 2.93         | 3.551(8)         | 124                |

Symmetry codes: (iv) x-1, y, z-1; (v) x, 1/2-y, 1/2+z; (vi) 1-x, y-1/2, 3/2-z; (viii) x-1, y, z-1; (ix) x, 1/2-y, 1/2+z; (x) 1-x, y-1/2, 3/2-z; (xi) x-1, 1/2-y, z-1/2; (xii) -x, 1-y, 1-z; (xiii) x-1, y, z.
